# Supplementary material for: Lifestyle Factors and Their Influence on Rheumatoid Arthritis: A Narrative Review
Source: MDPI journal article supplement (doi:10.3390/jcm11237179), 2022-12-02
Supplement: s1 [file s1]

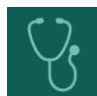

**Table S1:** Studies investigating the impact of nutrition

| Author Year Country                          | Patients (n)                  | Design             | Population     | Exposure                           | Outcome                          |
|----------------------------------------------|-------------------------------|--------------------|----------------|------------------------------------|----------------------------------|
| Gan et al., 2017, [8], USA                   | 67 cases<br>60 controls       | case-control       | at risk for RA | omega-3 fatty acid                 | RF positivity                    |
| Parks et al., 2013, [9], USA                 | 424 cases<br>50,460 controls  | case-control       | RA/Non-RA      | socioeconomic factors              | development of RA                |
| Johansson et al., 2018, [15], Sweden         | 1,721 cases<br>3,667 controls | case-control       | RA/Non-RA      | MD                                 | development of RA                |
| Nguyen et al., 2022, [17], France            | 480 cases<br>62,149 controls  | case-control       | RA/Non-RA      | fish                               | development of RA                |
| De Pablo et al., 2018, [21], Italy and Spain | 96 cases<br>258 controls      | case-control       | RA/Non-RA      | PUFA                               | development of RA                |
| Bergström et al., 2013, [28], Sweden         | 172 cases<br>688 controls     | case-control       | RA/Non-RA      | education, smoking, alcohol        | development of RA                |
| Ma et al., 2008, [7], USA                    | 1,958                         | cross-sectional    | Non-RA         | dietary fiber                      | markers of systemic inflammation |
| Gan et al., 2017, [8], USA                   | 2,166                         | cross-sectional    | at risk for RA | omega-3 fatty acid                 | RF positivity                    |
| Tabung et al., 2016, [11], USA               | 5,230                         | cross-sectional    | Non-RA         | NA                                 | development of EDII              |
| Tabung et al., 2016, [11], USA               | 3,633                         | cross-sectional    | Non-RA         | diet                               | markers of systemic inflammation |
| Nguyen et al., 2022, [13], Korea             | 33,966                        | cross-sectional    | Non-RA         | nutrients, fruits, green vegetable | development of RA/osteoarthritis |
| Ferguson et al., 2019, [25], UK              | 502,417                       | cross-sectional    | Non-RA         | central adiposity                  | development of RA                |
| Hu et al., 2017, [10], USA                   | 169,989                       | prospective cohort | Non-RA         | diet                               | development of RA                |
| Sparks et al., 2019, [12], USA               | 173,560                       | prospective cohort | Non-RA         | diet                               | development of RA                |
| Hu et al., 2015, [14], USA                   | 174,638                       | prospective cohort | Non-RA         | MD                                 | development of RA                |
| Pedersen et al., 2005, [18], Denmark         | 57,053                        | prospective cohort | Non-RA         | diet                               | development of RA                |
| Mazzuca et al., 2022, [19], UK               | 479,494                       | prospective cohort | Non-RA         | diet                               | development of RA                |
| Giuseppe et al., 2014, [20], Sweden          | 32,232                        | prospective cohort | Non-RA         | PUFA                               | development of RA                |
| Marchand et al., 2022, [22], USA             | 108,505                       | prospective cohort | Non-RA         | weight gain                        | development of RA                |
| Hair et al., 2013, [24], Netherlands         | 55                            | prospective cohort | at risk for RA | smoking, BMI                       | development of RA                |
| Marchand et al., 2021, [26], USA             | 50,682                        | prospective cohort | Non-RA         | waist circumference, BMI           | development of RA                |

|                                                |            |                      |           |                                            |                                 |
|------------------------------------------------|------------|----------------------|-----------|--------------------------------------------|---------------------------------|
| Bao et al., 2013, [37], USA                    | 118,962    | prospective cohort   | Non-RA    | nut consumption                            | mortality                       |
| Karlsö et al., 2008, [67], USA                 | 39,144     | prospective cohort   | Non-RA    | vitamin E                                  | development of RA               |
| Sparks et al., 2015, [50], USA                 | 53         | retrospective cohort | RA        | bariatric surgery                          | disease activity                |
| Hafström et al. 2001, [34], Sweden             | 66         | RCT                  | RA        | vegan, gluten-free diet                    | pain                            |
| Lozada-Mellado et al., 2022, [36], Mexico      | 90         | RCT                  | RA        | exercise vs. MD                            | cytokines                       |
| Estruch et al., 2018, [38], Spain              | 7447       | RCT                  | Non-RA    | diets                                      | mortality                       |
| Kjeldsen-Kragh et al., 1991, [41], Norway      | 53         | RCT                  | RA        | fasting and vegetarian diet                | disease activity                |
| Sköldstam et al., 2003, [42], Sweden           | 51         | RCT                  | RA        | MD vs. control diet                        | DAS28                           |
| Vadell et al., 2020, [44], Sweden              | 50         | RCT                  | RA        | intervention diet vs. control diet         | DAS28                           |
| Laar et al., 1992, [47], Netherlands           | 94         | RCT                  | RA        | allergen-free vs. allergen-restricted diet | disease activity                |
| Guagnano et al., 2021, [48], Italy             | 40         | RCT                  | RA        | exclusion diet vs. balanced diet           | disease activity                |
| Ranganath et al., 2022, [51], USA              | 40         | RCT                  | RA        | diet intervention                          | adiponectin, leptin, DAS28, HAQ |
| Alipour et al., 2014, [55], Iran               | 46         | RCT                  | RA        | probiotics                                 | cytokines, DAS28                |
| Hattaka et al., 2003, [56], Finland            | 21         | RCT                  | RA        | probiotics                                 | cytokines, SJC, TJC             |
| Pineda et al., 2011, [57], Canada              | 29         | RCT                  | RA        | probiotics                                 | cytokines, ACR20, HAQ           |
| Remans et al., 2004, [65], Netherlands         | 66         | RCT                  | RA        | PUFA                                       | TJC                             |
| Di Giuseppe et al., 2014, [16], multi-national | 174,701    | meta-analysis        | RA/Non-RA | fish                                       | development of RA               |
| Qin et al., 2015, [23], multi-national         | 11 studies | meta-analysis        | RA/Non-RA | BMI                                        | development of RA               |
| Jin et al., 2013, [29], multi-national         | 195,029    | meta-analysis        | RA/Non-RA | alcohol consumption                        | development of RA               |
| Schönenberger et al., 2021,                    | 7 RCTs     | meta-analysis        | RA        | diets                                      | pain                            |

|                                                         |               |               |        |                                     |                                  |  |
|---------------------------------------------------------|---------------|---------------|--------|-------------------------------------|----------------------------------|--|
| [33], multi-national                                    |               |               |        |                                     |                                  |  |
| Giosuè et al., 2022, [39], multi-national]              | 19 studies    | meta-analysis | Non-RA | fatty fish vs.lean fish             | mortality, cardiovascular events |  |
| Müller et al., 2001, [46], multi-national               | 4 RCTs        | meta-analysis | RA     | fasting followed by vegetarian diet | pain                             |  |
| Aqaeinezhad Rdudbane et al., 2018, [54], multi-national | 153<br>4 RCTs | meta-analysis | RA     | probiotics                          | cytokines, DAS28                 |  |
| Goldberg et al., 2007, [59], multi-national             | 17 RCTs       | meta-analysis | RA     | omega-3 fatty acid                  | pain                             |  |
| Miller et al., 2005, [68], multi-national               | 139,967       | meta-analysis | Non-RA | high-dosage vitamin E               | mortality                        |  |
| Kou et al., 2022, [69], multi-national                  | 39,845        | meta-analysis | RA     | vitamin E                           | TJC, SJC                         |  |

ACR20, American College of Rheumatology response criteria; BMI, body mass index; DAS28, disease activity score; EDII, Empirical Dietary Inflammatory Index; HAQ, health assessment questionnaire; NA, not applicable; PUFA, polyunsaturated fatty acids; RA, rheumatoid arthritis; RCT, randomised controlled trial; RF, rheumatoid factor; SJC, swollen joint count; TJC, tender joint count.
